# Supplementary material
Source: MDPI journal article supplement (https://www.mdpi.com/2077-0472/13/4/765)
Supplement: s1 [file s1]

**Table S1** Root weight density (g m<sup>-3</sup>) of cultivar DH618 and SC704 in different soil depths at silking and maturity under density D1 and D2 in 2019 and 2021

| Growth stage | Density | Cultivar | 2019             |          |          |         |          | 2021             |          |           |          |         |
|--------------|---------|----------|------------------|----------|----------|---------|----------|------------------|----------|-----------|----------|---------|
|              |         |          | Soil depths (cm) |          |          |         | Total    | Soil depths (cm) |          |           |          | Total   |
|              |         |          | 0-10             | 10-20    | 20-40    | 40-60   |          | 0-10             | 10-20    | 20-40     | 40-60    |         |
| Silking      | D1      | DH618    | 973.43cd         | 189.81a  | 93.93bc  | 39.11c  | 324.07cd | 1020.10cd        | 294.52a  | 111.49cde | 57.25abc | 370.84b |
|              |         | SC704    | 920.23cd         | 146.45ab | 82.45c   | 64.05b  | 303.29d  | 1071.04bcd       | 232.32bc | 127.65bcd | 73.11a   | 376.03b |
|              | D2      | DH618    | 1420.38a         | 185.79a  | 122.73b  | 48.61bc | 444.38a  | 1390.18a         | 315.60a  | 227.17a   | 65.35ab  | 499.58a |
|              |         | SC704    | 1384.66a         | 180.13a  | 102.21bc | 63.69b  | 432.67a  | 1395.52a         | 278.10ab | 128.48bc  | 57.17abc | 464.82a |
| Maturity     | D1      | DH618    | 963.25cd         | 127.06b  | 79.65c   | 37.04c  | 301.75d  | 837.65e          | 134.63e  | 107.37cde | 46.09bc  | 281.44d |
|              |         | SC704    | 859.27d          | 188.98a  | 97.34bc  | 43.28c  | 297.22d  | 1001.44d         | 152.63de | 94.20e    | 42.89c   | 322.79c |
|              | D2      | DH618    | 1016.01bc        | 193.82a  | 163.95a  | 108.88a | 370.67b  | 1163.95b         | 203.60cd | 141.24b   | 72.39a   | 395.29b |
|              |         | SC704    | 1144.17b         | 150.65ab | 76.36c   | 48.41bc | 354.90bc | 1157.41bc        | 156.16de | 101.20de  | 56.77abc | 367.88b |

Note: Means in the same column not sharing any letter are significantly different by the LSD-test at the 5% level of significance.

**Table S2** Between-row root weight density ( $\text{g m}^{-3}$ ) of cultivar DH618 and SC704 at silking and maturity under density D1 and D2 in 2019 and 2021

| Growth stage | Density | Cultivar | 2019                        |          |          |          |         | 2021                        |            |          |         |         |
|--------------|---------|----------|-----------------------------|----------|----------|----------|---------|-----------------------------|------------|----------|---------|---------|
|              |         |          | From narrow row center (cm) |          |          |          |         | From narrow row center (cm) |            |          |         |         |
|              |         |          | 0-11                        | 11-22    | 22-33    | 33-44    | 44-55   | 0-11                        | 11-22      | 22-33    | 33-44   | 44-55   |
| Silking      | D1      | DH618    | 138.14bc                    | 804.99c  | 542.94ab | 71.55ab  | 62.74a  | 251.36bc                    | 1032.04bcd | 336.57bc | 186.76a | 47.47b  |
|              |         | SC704    | 95.35c                      | 910.55c  | 447.58bc | 42.71c   | 20.29b  | 213.01cd                    | 1034.09bcd | 517.68a  | 72.37cd | 43.00bc |
|              | D2      | DH618    | 272.15a                     | 1548.43a | 264.96d  | 79.38a   | 56.97ab | 370.96a                     | 1629.39a   | 332.53bc | 114.37b | 50.63b  |
|              |         | SC704    | 132.92bc                    | 1649.11a | 281.35d  | 60.75abc | 39.23ab | 326.01ab                    | 1530.56a   | 275.51c  | 110.10b | 81.92a  |
| Maturity     | D1      | DH618    | 189.20b                     | 942.55c  | 303.98d  | 45.60bc  | 27.41ab | 180.53cd                    | 996.50d    | 149.10d  | 45.99d  | 35.07   |
|              |         | SC704    | 150.86bc                    | 921.94c  | 277.92d  | 79.39a   | 55.98ab | 190.18cd                    | 1018.84cd  | 306.26c  | 60.68cd | 38.00bc |
|              | D2      | DH618    | 173.31b                     | 1171.50b | 385.03cd | 69.73abc | 53.76ab | 361.58a                     | 1177.92b   | 346.37bc | 65.57cd | 25.03c  |
|              |         | SC704    | 100.55c                     | 932.15c  | 613.41a  | 64.78abc | 63.60a  | 153.07d                     | 1143.32bc  | 418.88ab | 78.71c  | 45.43b  |

Note: Means in the same column not sharing any letter are significantly different by the LSD-test at the 5% level of significance.

**Table S3** Root weight density (g m<sup>-3</sup>) of cultivar DH618 and SC704 at different positions at silking and maturity under density D1 and D2 in 2019 and 2021

| Growth stage | Density | Cultivar | 2019     |             | 2021      |             |
|--------------|---------|----------|----------|-------------|-----------|-------------|
|              |         |          | plant    | Among plant | plant     | Among plant |
| Silking      | D1      | DH618    | 561.59bc | 205.31bc    | 581.85cd  | 265.34b     |
|              |         | SC704    | 447.38d  | 221.78bc    | 583.90cd  | 272.09b     |
|              | D2      | DH618    | 699.34a  | 316.90a     | 760.29a   | 369.22a     |
|              |         | SC704    | 701.75a  | 298.13a     | 681.45ab  | 356.50a     |
| Maturity     | D1      | DH618    | 491.03cd | 207.10bc    | 527.64d   | 158.33c     |
|              |         | SC704    | 460.53d  | 215.56bc    | 615.09bcd | 176.64c     |
|              | D2      | DH618    | 622.82ab | 244.59b     | 683.50ab  | 251.19b     |
|              |         | SC704    | 694.31a  | 185.19c     | 619.55bc  | 242.05b     |

Note: “Plant” refers to the middle of the three portions based on the plant spacing for a single-plant, “Among Plant” refers to the average value of the other two portions. Means in the same column not sharing any letter are significantly different by the LSD-test at the 5% level of significance.

**Table S4** Root length density (cm cm<sup>-3</sup>) of cultivar DH618 and SC704 in different soil depths at silking and maturity under density D1 and D2 in 2019 and 2021

| Growth stage | Density | Cultivar | 2019             |        |         |       |         | 2021             |        |        |         |        |
|--------------|---------|----------|------------------|--------|---------|-------|---------|------------------|--------|--------|---------|--------|
|              |         |          | Soil depths (cm) |        |         |       | Total   | Soil depths (cm) |        |        |         | Total  |
|              |         |          | 0-10             | 10-20  | 20-40   | 40-60 |         | 0-10             | 10-20  | 20-40  | 40-60   |        |
| Silking      | D1      | DH618    | 1.05a            | 0.48b  | 0.23bcd | 0.14c | 0.47bc  | 1.00ab           | 0.57b  | 0.17d  | 0.10d   | 0.46bc |
|              |         | SC704    | 1.01ab           | 0.19d  | 0.16d   | 0.18c | 0.39d   | 0.87b            | 0.55b  | 0.31b  | 0.20ab  | 0.48ab |
|              | D2      | DH618    | 1.04ab           | 0.63a  | 0.47a   | 0.33a | 0.62a   | 1.11ab           | 0.71a  | 0.22cd | 0.15bcd | 0.55a  |
|              |         | SC704    | 0.92ab           | 0.34c  | 0.28b   | 0.26b | 0.45bcd | 1.19a            | 0.51b  | 0.34b  | 0.14cd  | 0.55a  |
| Maturity     | D1      | DH618    | 0.95ab           | 0.56ab | 0.26bc  | 0.13c | 0.48bc  | 0.58c            | 0.20d  | 0.27bc | 0.25a   | 0.33de |
|              |         | SC704    | 0.56c            | 0.20d  | 0.20bcd | 0.18c | 0.29e   | 0.55c            | 0.24cd | 0.16d  | 0.09d   | 0.26e  |
|              | D2      | DH618    | 0.80b            | 0.60a  | 0.40a   | 0.18c | 0.50b   | 0.87b            | 0.30c  | 0.42a  | 0.12cd  | 0.43bc |
|              |         | SC704    | 0.96ab           | 0.29cd | 0.18cd  | 0.14c | 0.39cd  | 0.95ab           | 0.27cd | 0.21cd | 0.15bc  | 0.40cd |

Note: Means in the same column not sharing any letter are significantly different by the LSD-test at the 5% level of significance.

**Table S5** Between-row root length density ( $\text{cm cm}^{-3}$ ) of cultivar DH618 and SC704 at silking and maturity under density D1 and D2 in 2019 and 2021

| Growth stage | Density | Cultivar | 2019                        |        |        |          |        | 2021                        |        |       |        |        |
|--------------|---------|----------|-----------------------------|--------|--------|----------|--------|-----------------------------|--------|-------|--------|--------|
|              |         |          | From narrow row center (cm) |        |        |          |        | From narrow row center (cm) |        |       |        |        |
|              |         |          | 0-11                        | 11-22  | 22-33  | 33-44    | 44-55  | 0-11                        | 11-22  | 22-33 | 33-44  | 44-55  |
| Silking      | D1      | DH618    | 0.41bc                      | 0.95ab | 0.53ab | 0.30b    | 0.18bc | 0.49bc                      | 0.83bc | 0.51a | 0.32a  | 0.17b  |
|              |         | SC704    | 0.37c                       | 0.75bc | 0.51ab | 0.22bcde | 0.09c  | 0.60ab                      | 0.89bc | 0.47a | 0.27a  | 0.19ab |
|              | D2      | DH618    | 0.72a                       | 0.91ab | 0.62ab | 0.45a    | 0.38a  | 0.66ab                      | 1.14a  | 0.57a | 0.24ab | 0.12c  |
|              |         | SC704    | 0.38bc                      | 0.90ab | 0.44bc | 0.27bc   | 0.26b  | 0.70a                       | 0.97ab | 0.55a | 0.30a  | 0.21a  |
| Maturity     | D1      | DH618    | 0.53b                       | 0.92ab | 0.50bc | 0.25bcd  | 0.18bc | 0.35cd                      | 0.71cd | 0.32b | 0.17bc | 0.09cd |
|              |         | SC704    | 0.33c                       | 0.56c  | 0.31c  | 0.15e    | 0.09c  | 0.33cd                      | 0.50d  | 0.27b | 0.13c  | 0.07d  |
|              | D2      | DH618    | 0.39bc                      | 1.02a  | 0.70a  | 0.20cde  | 0.18bc | 0.52abc                     | 1.02ab | 0.34b | 0.14c  | 0.11cd |
|              |         | SC704    | 0.26c                       | 0.85ab | 0.62ab | 0.16de   | 0.08c  | 0.29d                       | 0.89bc | 0.55a | 0.17bc | 0.09cd |

Note: Means in the same column not sharing any letter are significantly different by the LSD-test at the 5% level of significance.

**Table S6** Root length density (cm cm<sup>-3</sup>) of cultivar DH618 and SC704 at different positions at silking and maturity under density D1 and D2 in 2019 and 2021

| Growth stage | Density | Cultivar | 2019    |             | 2021   |             |
|--------------|---------|----------|---------|-------------|--------|-------------|
|              |         |          | plant   | Among plant | plant  | Among plant |
| Silking      | D1      | DH618    | 0.48bc  | 0.47b       | 0.51b  | 0.44b       |
|              |         | SC704    | 0.47bc  | 0.35cd      | 0.60a  | 0.43b       |
|              | D2      | DH618    | 0.64a   | 0.60a       | 0.65a  | 0.49ab      |
|              |         | SC704    | 0.50bc  | 0.42bc      | 0.50bc | 0.57a       |
| Maturity     | D1      | DH618    | 0.56ab  | 0.43bc      | 0.41d  | 0.29c       |
|              |         | SC704    | 0.35d   | 0.26d       | 0.29e  | 0.24c       |
|              | D2      | DH618    | 0.55abc | 0.47b       | 0.42cd | 0.43b       |
|              |         | SC704    | 0.46c   | 0.36c       | 0.39d  | 0.40b       |

Note: Note: “Plant” refers to the middle of the three portions based on the plant spacing for a single-plant, “Among Plant” refers to the average value of the other two portions. Means in the same column not sharing any letter are significantly different by the LSD-test at the 5% level of significance.

**Table S7** Root dry weight (g plant<sup>-1</sup>) of cultivar DH618 and SC704 in different soil depths at silking and maturity under density D1 and D2 in 2019 and 2021

| Growth stage | Density | Cultivar | 2019             |        |         |       |         | 2021             |         |        |        |        |
|--------------|---------|----------|------------------|--------|---------|-------|---------|------------------|---------|--------|--------|--------|
|              |         |          | Soil depths (cm) |        |         |       | Total   | Soil depths (cm) |         |        |        | Total  |
|              |         |          | 0-10             | 10-20  | 20-40   | 40-60 |         | 0-10             | 10-20   | 20-40  | 40-60  |        |
| Silking      | D1      | DH618    | 12.85a           | 2.51a  | 2.48ab  | 1.03b | 18.87a  | 13.47a           | 3.89a   | 2.94bc | 1.51ab | 21.81a |
|              |         | SC704    | 11.81ab          | 1.93b  | 2.18abc | 1.69a | 17.61ab | 14.14a           | 3.07b   | 3.37ab | 1.93a  | 22.5a  |
|              | D2      | DH618    | 11.72ab          | 1.53bc | 2.03bc  | 0.80b | 16.08bc | 11.47b           | 2.60bc  | 3.75a  | 1.08bc | 18.9b  |
|              |         | SC704    | 11.42b           | 1.49bc | 1.69cd  | 1.05b | 15.65c  | 11.51b           | 2.29cd  | 2.12de | 0.94c  | 16.87c |
| Maturity     | D1      | DH618    | 12.71a           | 1.68bc | 2.10abc | 0.98b | 17.47ab | 11.06b           | 1.78def | 2.83bc | 1.22bc | 16.89c |
|              |         | SC704    | 11.34b           | 2.49a  | 2.57ab  | 1.14b | 17.55ab | 13.22a           | 2.01de  | 2.49cd | 1.13bc | 18.85b |
|              | D2      | DH618    | 8.38c            | 1.60bc | 2.71a   | 1.80a | 14.48c  | 9.60c            | 1.68ef  | 2.33cd | 1.19bc | 14.81d |
|              |         | SC704    | 9.44c            | 1.24c  | 1.26d   | 0.80b | 12.74d  | 9.55c            | 1.29f   | 1.67e  | 0.94c  | 13.44d |

Note: Means in the same column not sharing any letter are significantly different by the LSD-test at the 5% level of significance.

**Table S8** Root length (m plant<sup>-1</sup>) of cultivar DH618 and SC704 in different soil depths at silking and maturity under density D1 and D2 in 2019 and 2021

|          |         |          | 2019             |        |         |          |          | 2021             |         |         |        |          |
|----------|---------|----------|------------------|--------|---------|----------|----------|------------------|---------|---------|--------|----------|
| Growth   | Density | Cultivar | Soil depths (cm) |        |         |          | Total    | Soil depths (cm) |         |         |        | Total    |
|          |         |          | 0-10             | 10-20  | 20-40   | 40-60    |          | 0-10             | 10-20   | 20-40   | 40-60  |          |
| Silking  | D1      | DH618    | 138.50a          | 63.11b | 59.63bc | 37.14bcd | 298.39a  | 132.15a          | 75.52a  | 45.9cd  | 25.45b | 279.01b  |
|          |         | SC704    | 133.87a          | 25.04d | 42.84cd | 48.79ab  | 250.54bc | 114.31ab         | 72.91a  | 81.73a  | 52.53a | 321.49a  |
|          | D2      | DH618    | 85.54b           | 51.78c | 77.50a  | 54.15a   | 268.96ab | 91.52bcd         | 58.17b  | 36.26d  | 24.52b | 210.47cd |
|          |         | SC704    | 75.81b           | 27.83d | 45.56cd | 42.93abc | 192.14de | 98.46bc          | 42.04c  | 56.05bc | 23.00b | 219.55cd |
| Maturity | D1      | DH618    | 125.34a          | 74.51a | 68.41ab | 33.59cde | 301.85a  | 77.11cd          | 26.93de | 71.67ab | 65.57a | 241.27c  |
|          |         | SC704    | 74.46b           | 26.85d | 52.92bc | 47.64ab  | 201.88d  | 72.87d           | 31.57d  | 41.58cd | 24.79b | 170.80e  |
|          | D2      | DH618    | 66.22b           | 49.39c | 66.76ab | 30.25de  | 212.62cd | 72.17d           | 25.02de | 68.86ab | 19.43b | 185.47de |
|          |         | SC704    | 79.27b           | 24.27d | 29.32d  | 23.42e   | 156.27e  | 78.75cd          | 21.96e  | 35.17d  | 25.34b | 161.22e  |

Note: Means in the same column not sharing any letter are significantly different by the LSD-test at the 5% level of significance.
